# Supplementary material for: Application of Urinary Polyphenol Biomarkers Measured by Liquid Chromatography Tandem Mass Spectrometry to Assess Polyphenol Intake and Their Association with Overweight and Obesity in Free-Living Healthy Subjects
Source: Hindawi journal article supplement (doi:10.1155/2019/4809836), 2019-06-16
Supplement: f1 [file 4809836.f1.docx]

**Supplementary Table 1.** Ion transitions for polyphenol biomarkers and instrumental parameters for their MS/MS detection in MRM mode

|  | Ion transition (m/z) | DP  (psi) | CE  (psi) |
| --- | --- | --- | --- |
| Caffeic acid | 178.9 →135.0 | -90 | -22 |
| Ferulic acid | 192.9→134.0 | -79 | -23 |
| Chlorogenic acid | 353.1→191.1 | -80 | -23 |
| Coumaric acid | 162.8→119.0 | -75 | -21 |
| Cinnamic acid | 146.8→102.9 | -120 | -14 |
| Syringic acid | 197.0→182.0 | -100 | -19 |
| Vanillic acid | 166.9→152.0 | -88 | -20 |
| Procatechuic acid | 152.9→109.0 | -90 | -20 |
| Quercetin | 301.0→151.0 | -125 | -30 |
| Quercetin 3-glucuronide | 477.1→301.1 | -100 | -30 |
| Kaempferol | 285.0→116.9 | -103 | -52 |
| Naringenin | 271.0→151.0 | -115 | -25 |
| Hesperetin | 301.0→164.0 | -120 | -32 |
| 3-(4-Hydroxyphenyl) propionic acid | 165.0→121.0 | -95 | -16 |
| Hydroxyhippuric acid | 194.1→73.0 | -46 | -13 |
| 3,4-Dihydroxyphenylacetic acid | 167.0→123.1 | -35 | -24 |
| Homovanillic acid | 181.0→137.0 | -125 | -16 |
| 3-hydroxybenzoic acid | 137.0→93.0 | -70 | -25 |
| 3-hydroxy-4-methoxycinnamic acid | 192.9→134.0 | -86 | -28 |
| Sinapic acid | 223.0→164.0 | -91 | -26 |
| Hippuric acid | 178.0→134.0 | -86 | -28 |
| 3-hydroxyphenylacetic acid | 151.0→107.0 | -76 | -11 |
